# Supplementary material
Source: PubMed Central journal article supplement (PMC4089995)

**sFigure 1**

**A**

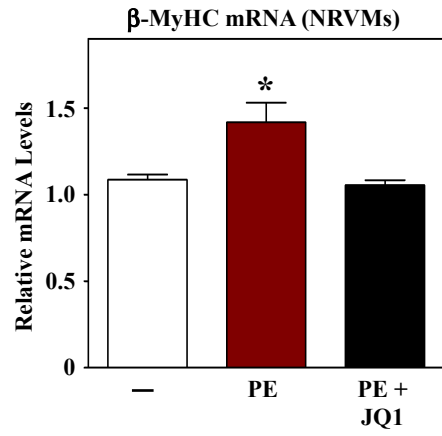

**B**

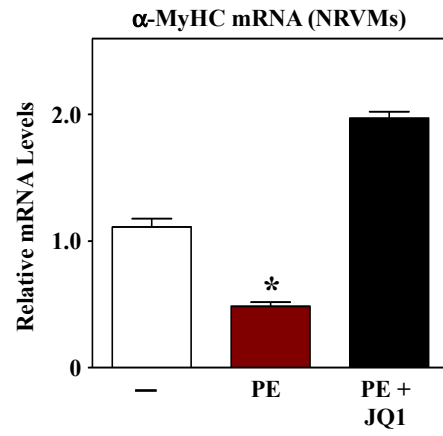

Supplement: NIHMS600420-supplement-sFig_1.pdf [file NIHMS600420-supplement-sFig_1.pdf]

**sFigure 2**

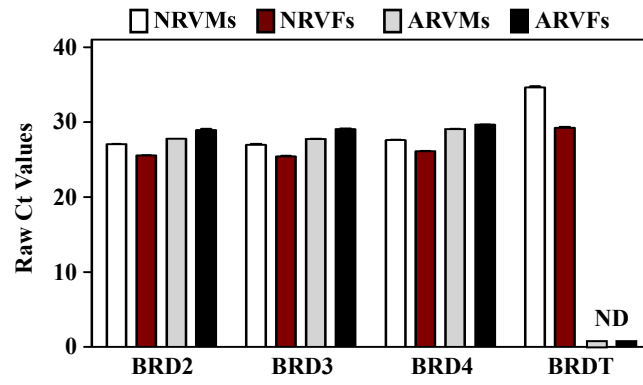

Supplement: NIHMS600420-supplement-sFig_2.pdf [file NIHMS600420-supplement-sFig_2.pdf]

**sFigure 3**

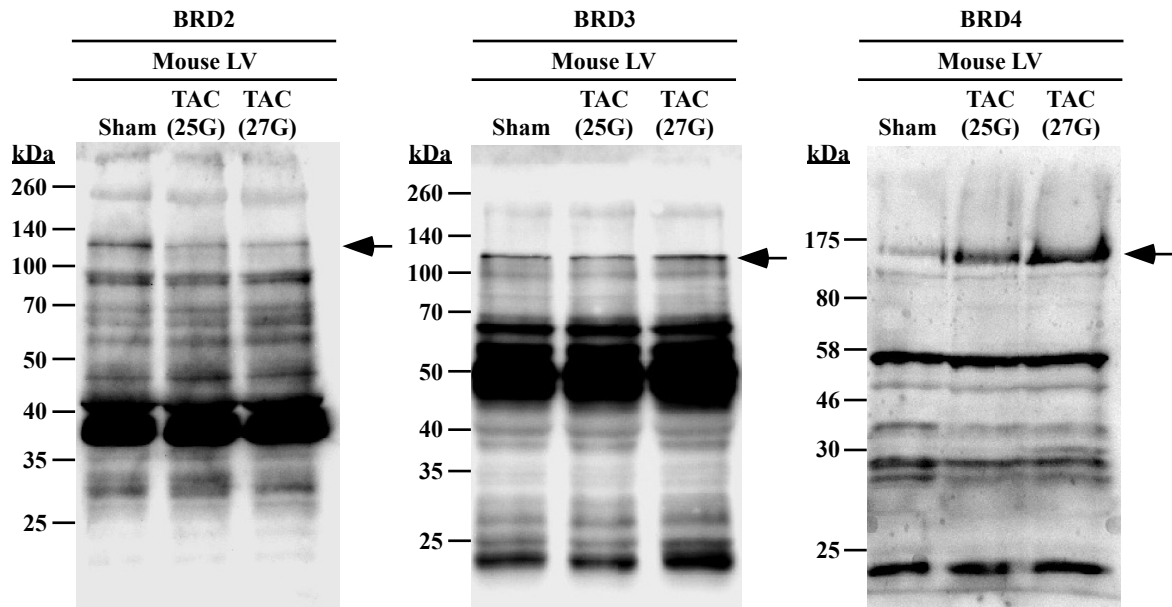

Supplement: NIHMS600420-supplement-sFig_3.pdf [file NIHMS600420-supplement-sFig_3.pdf]

**sFigure 4**

**A**

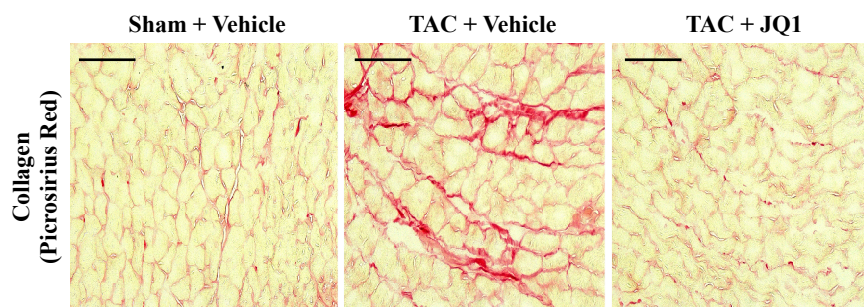

**B**

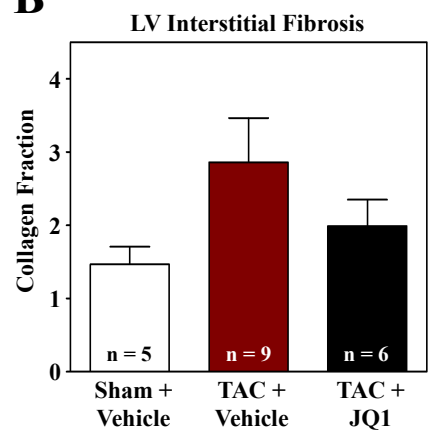

Supplement: NIHMS600420-supplement-sFig_4.pdf [file NIHMS600420-supplement-sFig_4.pdf]
